# Supplementary material for: Cu MOF-based catalytic sensing for formaldehyde
Source: Royal Society of Chemistry journal article supplement (doi:10.1039/c8tc01703d), 2018-01-01
Supplement: c8tc01703d1.pdf [file c8tc01703d1.pdf]

Electronic Supplementary Material (ESI) for Catalysis Science & Technology.  
This journal is © The Royal Society of Chemistry 2018

## Supporting Information

### **Cu MOFs-based catalytic sensing for formaldehyde**

**Ping Gao,<sup>a,b</sup> Xiang-Ying Sun,<sup>a,b</sup> Bin Liu,<sup>a,b</sup> Hui-Ting Lian,<sup>a,b</sup> Xin-Qiang Liu,<sup>c</sup> Jiang-Shan Shen<sup>a,b\*</sup>**

**a.** College of Materials Science and Engineering, Huaqiao University, Xiamen 361021, China. E-mail: jsshens@hqu.edu.cn

**b.** Key Laboratory of Molecular Designing and Green Conversions (Huaqiao University), Fujian Province University, Xiamen 361021, China

**c.** Department of Environmental Science and Engineering, Tan Kah Kee College Xiamen University, Zhangzhou, 363105, China

\* Corresponding author: E-mail: jsshens@hqu.edu.cn

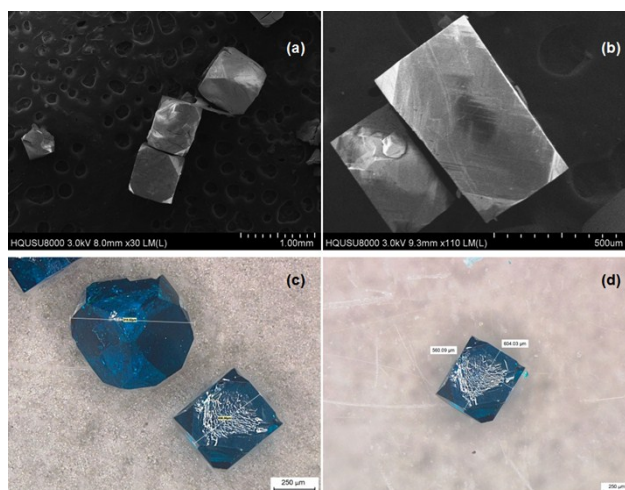

**Fig. S1** (a, b) SEM images and (c, d) digital versatile optical microscope images of the as-prepared Cu-BTC MOFs.

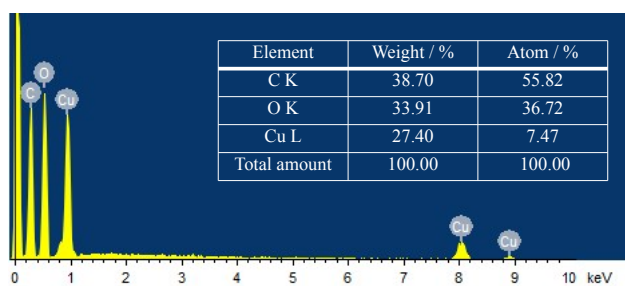

**Fig. S2** EDS spectrum of Cu-BTC MOFs. The content of C, O and Cu atoms of the catalyst were 55.82%, 36.72% and 7.47%, respectively.

**Table S1.** Crystal data and structure refinement of the as-prepared Cu-BTC MOFs.<sup>a</sup>

|                                                  |                                                                  |
|--------------------------------------------------|------------------------------------------------------------------|
| Empirical formula                                | C <sub>6</sub> H <sub>2</sub> CuO <sub>5</sub>                   |
| Formula weight                                   | 217.62                                                           |
| Temperature                                      | 293 K                                                            |
| Wavelength                                       | 0.71073 Å                                                        |
| Crystal system                                   | Cubic                                                            |
| Space group                                      | <i>Fm-3m</i>                                                     |
| <i>a</i> (Å)                                     | 26.3805(3)                                                       |
| <i>b</i> (Å)                                     | 26.3805(3)                                                       |
| <i>c</i> (Å)                                     | 26.3805(3)                                                       |
| $\alpha$ (deg)                                   | 90                                                               |
| $\beta$ (deg)                                    | 90                                                               |
| $\gamma$ (deg)                                   | 90                                                               |
| Volume (Å <sup>3</sup> )                         | 18359.0(6)                                                       |
| Z                                                | 48                                                               |
| Absorption coefficient (mm <sup>-1</sup> )       | 1.415                                                            |
| F(000)                                           | 5136                                                             |
| Crystal size (mm)                                | 0.09 x 0.09 x 0.07                                               |
| Theta range for data collection (°)              | 3.089 to 26.315                                                  |
| Limiting indices                                 | -22 ≤ h ≤ 32,<br>-28 ≤ k ≤ 24,<br>-15 ≤ l ≤ 32,                  |
| Reflections collected / unique                   | 13694 / 985 [ <i>R</i> <sub>int</sub> = 0.0362]                  |
| Completeness to theta = 26.00 (%)                | 98.3                                                             |
| Absorption correction                            | Semi-empirical from equivalents                                  |
| Max. and min. transmission                       | 1.00000 and 0.42285                                              |
| Refinement method                                | Full-matrix least-squares on <i>F</i> <sup>2</sup>               |
| Data / restraints / parameters                   | 985 / 0 / 36                                                     |
| Goodness-of-fit on <i>F</i> <sup>2</sup>         | 1.138                                                            |
| Final R indices [ <i>I</i> > 2σ( <i>I</i> )]     | <i>R</i> <sub>1</sub> = 0.0297, w <i>R</i> <sub>2</sub> = 0.0769 |
| R indices (all data)                             | <i>R</i> <sub>1</sub> = 0.0369, w <i>R</i> <sub>2</sub> = 0.0818 |
| Largest diff. peak and hole (e Å <sup>-3</sup> ) | 0.279 and -0.467                                                 |

<sup>a</sup> The final refinement was performed with a modification of the structure factors for the electron densities of the disordered solvents using the SQUEEZE option of PLATON.

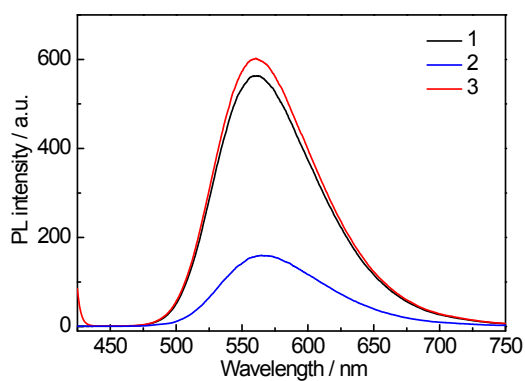

**Fig. S3** The comparisons of the PL spectra of the as-prepared Cu-BTC MOFs – OPD solution in the presence (1) and absence (2) of dissolved oxygen, in the absence of room light (3).

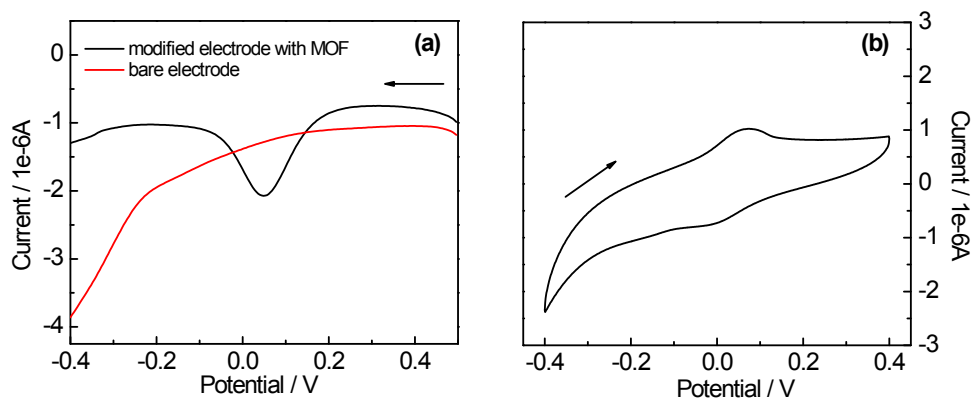

**Fig. S4** DPV (a) and CV (b) curves of Cu-BTC MOFs in  $N_2$ -saturated 50 mM Tris-HCl buffer solution of pH 7.4 containing 15% acetonitrile (v/v). Scanning rate was 50  $mV \cdot S^{-1}$ .

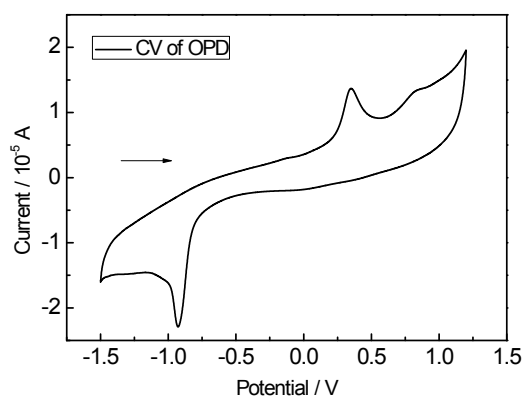

**Fig. S5** The CV curve of OPD in  $N_2$ -saturated 50 mM Tris-HCl buffer solution of pH 7.4 containing 15% acetonitrile (v/v). Scanning rate was  $50 \text{ mV} \cdot \text{S}^{-1}$ .

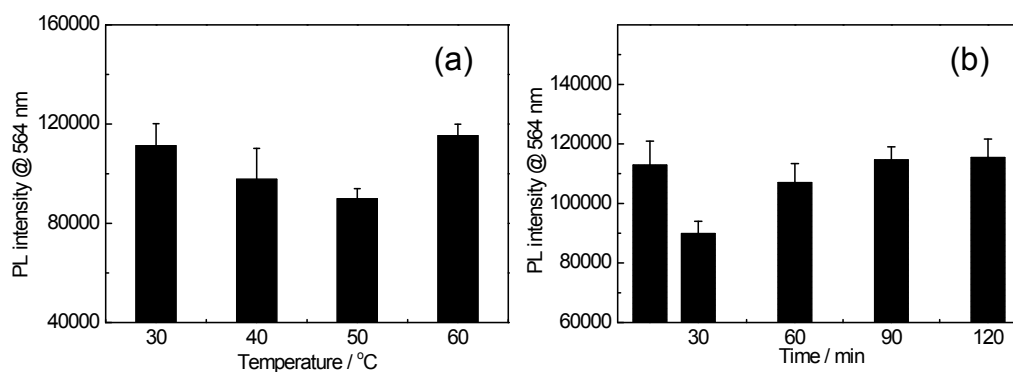

**Fig. S6** The PL intensity at 564 nm wavelength of the catalytic fluorogenic reaction system in the presence of gaseous formaldehyde under different the temperature (a), and time (b) of the reaction of OPD and formaldehyde. Experimental conditions:  $[\text{OPD}] = 0.08 \text{ mM}$ ; the flow rate of formaldehyde gas was fixed as  $40 \text{ mL} \cdot \text{min}^{-1}$ ; Cu-BTC MOFs concentration was  $0.67 \text{ mg} \cdot \text{mL}^{-1}$ ; 50 mM Tris-HCl buffer solution of pH 7.4 containing 15% acetonitrile content was used.

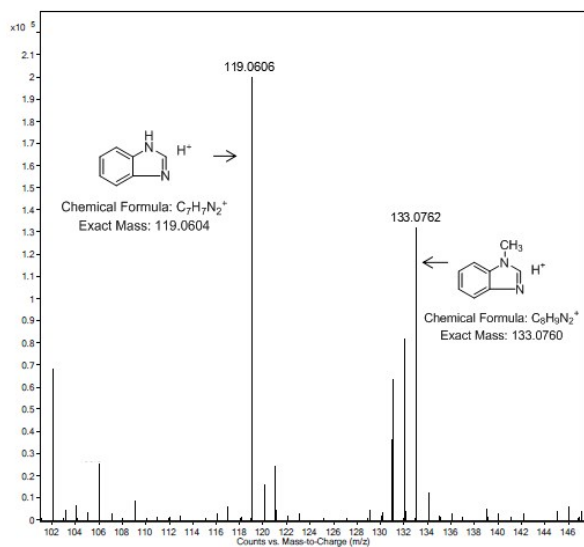

**Fig. S7** ESI-MS result of the product of the condensation reaction between OPD and formaldehyde.
